# Supplementary material for: Zim17/Tim15 links mitochondrial iron–sulfur cluster biosynthesis to nuclear genome stability
Source: PubMed Central journal article supplement — Nucleic Acids Res. 2011 Apr 21;39(14):6002–15. doi: 10.1093/nar/gkr193 (PMC3152343; doi:10.1093/nar/gkr193), 2011-04-21
Supplement: supp_gkr193_Suppl_Figures_25-04-11.pdf [file supp_gkr193_Suppl_Figures_25-04-11.pdf]

## SUPPLEMENTAL DATA

Supplemental Data include one figure and two tables, and the microarray data in excel format.

**Supplemental Figure S1.** (A) Protein carbonylation in *zim17Δ*  $\rho^+$  and  $\rho^-$  strains grown in the absence (-) or presence of oxidative stress (+) induced by 2mM *t*-BOOH. Total protein content is shown (Coomassie staining, left) together with the immunodetection of carbonylated proteins (right). Relative intensity of protein carbonylation normalized to the signal obtained by Coomassie staining. (B) Tetrad analysis crossing *zim17Δ* with *rad17Δ* mutant cells. Note that viable *zim17Δrad17Δ* spores could not be recovered. (C) Drop test analysis of serial 1:10 dilutions of WT and *zim17Δ* cells spotted onto media containing different concentrations of MMS and 4-NQO or of cells exposed to different doses of UV-irradiation (254nm). (D) Tetrad analysis crossing *zim17Δ* with *npa1-1* cells. For explanation see B above.

**Supplemental Table S1.** Yeast strains and plasmids used in this study.

**Supplemental Table S2.** Transcriptionally up- and down-regulated genes in *zim17Δ* mutants.

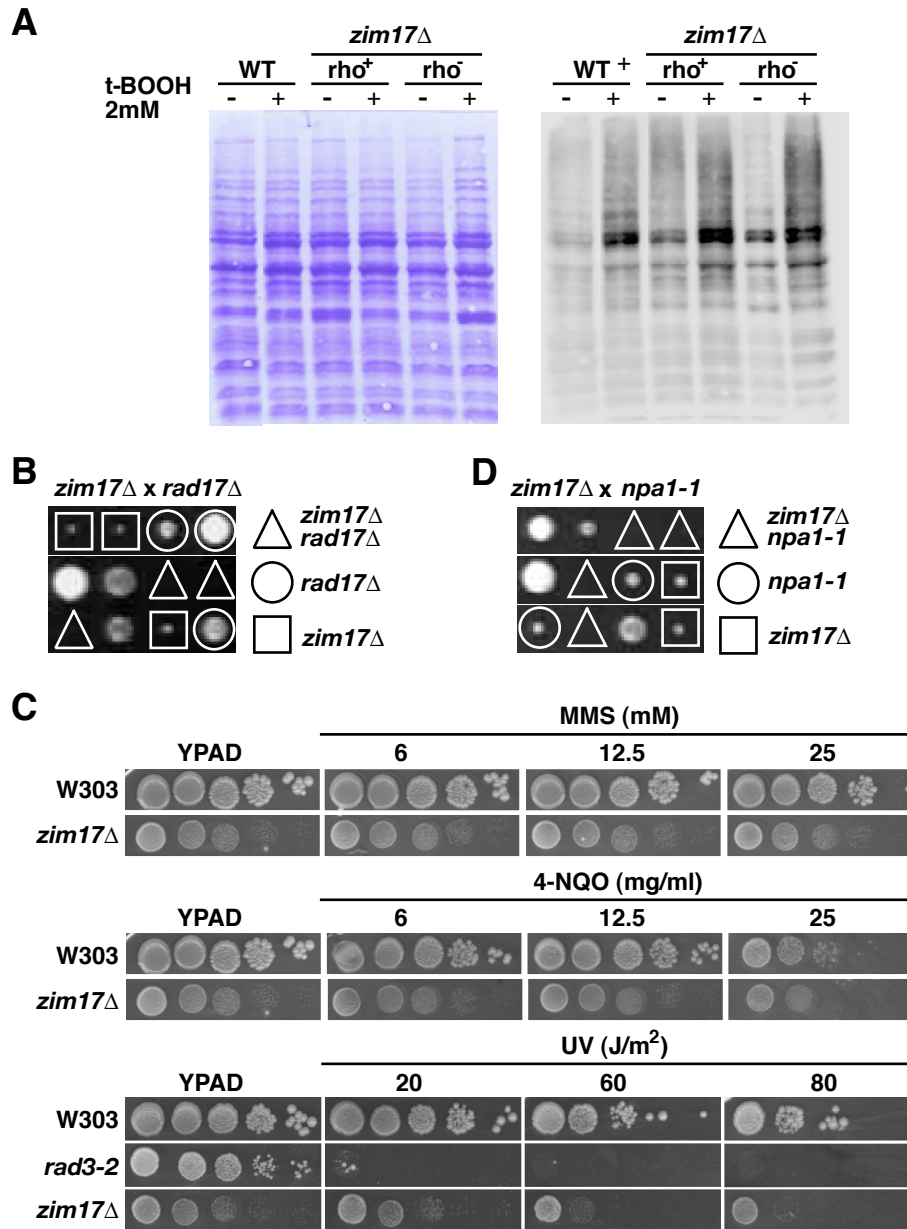

Supp. Figure 1

**Supplemental Table S1.** Yeast strains and plasmids used in this study.

| <b>strain</b> | <b>genotype</b>                                                                                                                | <b>source</b> |
|---------------|--------------------------------------------------------------------------------------------------------------------------------|---------------|
| W303-1A       | MAT a <i>ade2-1 trp1-1 ura3-1 his3-11 leu2-3,112 can1-100</i>                                                                  | (65)          |
| W303-1B       | MAT $\alpha$ <i>ade2-1 trp1-1 ura3-1 his3-11 leu2-3,112 can1-100</i>                                                           | (65)          |
| BY4741        | MAT a <i>trp1-1 ura3<math>\Delta</math>0 leu2<math>\Delta</math>0 his3<math>\Delta</math>0 met15<math>\Delta</math>0</i>       | (66)          |
| BY4742        | MAT $\alpha$ <i>trp1-1 ura3<math>\Delta</math>0 leu2<math>\Delta</math>0 his3<math>\Delta</math>0 lys2<math>\Delta</math>0</i> | (66)          |
| FPAA001-09B   | MAT $\alpha$ <i>ura3<math>\Delta</math>0 leu2<math>\Delta</math>0 zim17::KAN</i>                                               | Euroscarf     |
| WRK5-3C       | W303-1A, <i>leu2-k::URA3-ADE2::leu2-k</i>                                                                                      | (24)          |
| WFNL-5A       | MAT $\alpha$ <i>ura3 leu2 leu2-k::URA3-ADE2::leu2-k</i>                                                                        | this study    |
| WFNL-5B       | MATa <i>ura3 leu2 zim17::KAN leu2-k::URA3-ADE2::leu2-k</i>                                                                     | this study    |
| WZFN3D-1B     | W303-1B <i>zim17::KAN</i>                                                                                                      | this study    |
| WZFN3D-1D     | W303-1A <i>zim17::KAN</i>                                                                                                      | this study    |
| MCDY101       | W303-1B <i>zim17::KAN leu2-k::URA3-ADE2::leu2-k</i>                                                                            | this study    |
| MCDY102       | W303-1A <i>rad24::TRP1 leu2-k::URA3-ADE2::leu2-k</i>                                                                           | this study    |
| MCDY103       | W303-1B <i>zim17::KAN rad24::TRP1 leu2-k::URA3-ADE2::leu2-k</i>                                                                | this study    |
| KM84          | MAT a <i>ade2-1 trp1-HIII ura3-52 his4-260 leu2-3,112 lys2::Bam, can1-100 URA3::rDNA ADE2::rDNA</i>                            | (25)          |
| MCDY104       | MAT a <i>ade2-1 trp1 ura3-52 leu2-3,112 his zim17::KAN URA3::rDNA ADE2::rDNA</i>                                               | this study    |
| WRS52-4B      | MATa-inc <i>ade2-1 trp1-1 ura3-52 his3-11 ade3::GAL-HO LEU2::SFA1, rad52::KAN</i>                                              | (67)          |
| MCDY105       | MAT a <i>ade2-1 trp1-1 ura3-52 leu2-3,11 his3-11 met15<math>\Delta</math>0 lys2<math>\Delta</math>0 zim17::KAN rad52::KAN</i>  | this study    |
| Y04222        | BY4741 <i>mus81::KANMX4</i>                                                                                                    | Euroscarf     |
| MCDY106       | MAT $\alpha$ <i>trp1 ura3 leu2 his3-11 met15<math>\Delta</math>0 zim17::KAN mus81::KAN</i>                                     | this study    |
| Y10775        | BY4742 <i>sgs1::KAN</i>                                                                                                        | Euroscarf     |
| MCDY107       | MATa <i>ade2-1 trp1-1 leu2 his3 zim17::KAN sgs1::KAN</i>                                                                       | this study    |
| AMH5          | <i>ho<math>\Delta</math> MATa ade1-100 ura3-52 leu2-3 his4-519 ade3::GAL::HO cdc44-8::URA3</i>                                 | (68)          |

| <b>strain</b> | <b>genotype</b>                                                                           | <b>source</b> |
|---------------|-------------------------------------------------------------------------------------------|---------------|
| MCDY108       | MAT a <i>ade trp1-1 ura3-52 leu2 his zim17::KAN cdc44-8::URA3</i>                         | this study    |
| DD379         | W303-1A <i>rad24::TRP1</i>                                                                | D. Durocher   |
| MCDY109       | <i>zim17::KAN rad24::TRP1</i>                                                             | this study    |
| DD303         | W303-1A <i>elg1::KAN</i>                                                                  | D. Durocher   |
| MCDY110       | W303-1B <i>zim17::KAN elg1::KAN</i>                                                       | this study    |
| DD377         | W303-1A <i>elg1::KAN</i>                                                                  | D. Durocher   |
| MCDY111       | W303-1A <i>zim17::KAN ctf18::HYG</i>                                                      | this study    |
| AMH4          | <i>hoΔ MATa ade1-100 ura3-52 leu2-3 his4-519 ade3::GAL::HO pol30-52</i>                   | (68)          |
| MCDY112       | MAT α <i>ade2-1 trp1-1 ura3 -52 leu2-3,112 his3-11 met15Δ0 lys2Δ0 zim17::KAN pol30-52</i> | this study    |
| MC2_7B        | MAT α <i>ade2 ura3 leu2 his3 leu2-k::URA3-ADE2::leu2-k cdc2-3</i>                         | this study    |
| MCDY113       | MAT a <i>ade2 ura3 trp1-1 leu2-3,112 his3-11 zim17::KAN cdc2-3</i>                        | this study    |
| Y14963        | BY4742 <i>rad27::KAN</i>                                                                  | Euroscarf     |
| MCDY114       | MAT α <i>ade2-1 trp1-1 ura3 leu2 his3-11 zim17::KAN rad27::KAN</i>                        | this study    |
| Y00994        | BY4741 <i>rrm3::KAN</i>                                                                   | Euroscarf     |
| MCDY115       | MAT α <i>ade2-1 trp1-1 ura3 leu2 his3-11 zim17::KAN rrm3::KAN</i>                         | this study    |
| Y00509        | BY4741 <i>pif1::KAN</i>                                                                   | Euroscarf     |
| MCDY116       | MAT α <i>ade2-1 trp1-1 ura3 leu2 his3-11 zim17::KAN pif1::KAN</i>                         | this study    |
| Y11171        | BY4742 <i>tof1::KAN</i>                                                                   | Euroscarf     |
| MCDY117       | MAT α <i>ade2-1 trp1-1 ura3 leu2 his3-11 zim17::KAN, tof1::KAN</i>                        | this study    |
| JVY325        | W303-1A <i>npa1-1</i>                                                                     | (22)          |
| DMP1913-11C   | W303-1B <i>rad17::TRP1</i>                                                                | (69)          |
| MMI-81        | W303-1B <i>RAD5 rad3-102::HYG</i>                                                         | (62)          |

|                   |                                                                                                                               |                                                |
|-------------------|-------------------------------------------------------------------------------------------------------------------------------|------------------------------------------------|
| MCDY118           | W303-1A <i>npa1-1 leu2-k::URA3-ADE2::leu2-k</i>                                                                               | this study                                     |
| <b>strain</b>     | <b>genotype</b>                                                                                                               | <b>source</b>                                  |
| FLRA006-01B(A)    | MAT $\alpha$ <i>ura3<math>\Delta</math>0 leu2<math>\Delta</math>0 YGL099w(154,1920)::KAN</i>                                  | Euroscarf                                      |
| Y02292 (acc. no.) | MAT $\alpha$ <i>ura3<math>\Delta</math>0 leu2<math>\Delta</math>0 rpl13::KAN</i>                                              | Euroscarf                                      |
| MCDY119           | MATa <i>ura3 leu2 YGL099w(154,1920)::KAN leu2-k::URA3-ADE2::leu2-k</i>                                                        | this study                                     |
| MCDY120           | MATa <i>ura3 leu2 rpl13::KAN leu2-k::URA3-ADE2::leu2-k</i>                                                                    | this study                                     |
| <b>plasmid</b>    | <b>description</b>                                                                                                            | <b>source</b>                                  |
| pWJ1344           | <i>LEU2, RAD52::YFP::CYCt</i>                                                                                                 | R.Rothstein,<br>Columbia<br>University<br>(50) |
| pRS316-RPS2-eGFP  | <i>URA3, RPS2::GFP</i>                                                                                                        | (49)                                           |
| pRS316-RPL25-eGFP | <i>TRP1, RPL25::GFP</i>                                                                                                       | (32)                                           |
| pRS314-L          | pRS314 containing two 598 bp <i>ClaI-EcoRV LEU2</i> fragments repeated in direct orientation separated by 31 bp of polylinker |                                                |

**Supplemental Table 2.** Transcriptionally up-regulated and down-regulated genes ( $\geq 2$  fold, Pvalues  $\geq 0.05$ ) that cluster within predictable GO-terms versus all *S. cerevisiae* ORFs.

| Up-regulated genes                                      | Fold increase | Down-regulated genes                    | Fold decrease |
|---------------------------------------------------------|---------------|-----------------------------------------|---------------|
| <b>Iron metabolism<br/>(iron starvation adaptation)</b> |               | <b>Electron transport chain</b>         |               |
| <i>Siderophore transport</i>                            |               | <i>ACO2</i>                             | 2.9           |
| <i>FIT1</i>                                             | 92.1          | <i>ATP17</i>                            | 2.2           |
| <i>FIT2</i>                                             | 88.2          | <i>ATP20</i>                            | 2.6           |
| <i>FIT3</i>                                             | 28.8          | <i>CCP1</i>                             | 2.9           |
| <i>Iron ion homeostasis</i>                             |               | <i>COR1</i>                             | 2.5           |
| <i>CAD1</i>                                             | 2.8           | <i>COX4*</i>                            | 2.8           |
| <i>CTH2</i>                                             | 41.7          | <i>COX5A*</i>                           | 2.5           |
| <i>FRE8</i>                                             | 2.6           | <i>COX6*</i>                            | 3.0           |
| <i>HMX1</i>                                             | 3.2           | <i>COX7</i>                             | 2.3           |
| <i>Iron transport</i>                                   |               | <i>COX8*</i>                            | 2.6           |
| <i>ARN1</i>                                             | 18.1          | <i>CYB5</i>                             | 2.6           |
| <i>ARN2</i>                                             | 41.1          | <i>CYC1*</i>                            | 3.7           |
| <i>ENB1</i>                                             | 15.7          | <i>CYT1</i>                             | 2.7           |
| <i>FET3</i>                                             | 6.0           | <i>QCR10</i>                            | 2.1           |
| <i>FET4</i>                                             | 2.0           | <i>QCR2</i>                             | 2.8           |
| <i>FET5</i>                                             | 2.5           | <i>QCR6*</i>                            | 2.7           |
| <i>FMP23</i>                                            | 5.8           | <i>QCR7*</i>                            | 2.5           |
| <i>FRE1</i>                                             | 7.3           | <i>QCR9*</i>                            | 2.0           |
| <i>FRE2</i>                                             | 19.3          | <i>RIP1*</i>                            | 2.6           |
| <i>FRE3</i>                                             | 8.5           | <i>SDH1*</i>                            | 3.0           |
| <i>FRE4</i>                                             | 21.2          | <i>SDH2*</i>                            | 4.3           |
| <i>FRE5</i>                                             | 64.3          | <i>SDH3*</i>                            | 2.9           |
| <i>FRE6</i>                                             | 4.0           | <i>SDH4</i>                             | 2.4           |
| <i>FTH1</i>                                             | 3.2           | <b>Phosphate metabolism</b>             |               |
| <i>FTR1</i>                                             | 6.8           | <i>PHO11/12</i>                         | 10.9          |
| <i>MRS4</i>                                             | 3.4           | <i>PHO5</i>                             | 17.2          |
| <i>PCA1</i>                                             | 3.2           | <i>PHO84</i>                            | 7.2           |
| <i>SIT1</i>                                             | 31.8          | <i>VTC3</i>                             | 3.3           |
| <i>SMF3</i>                                             | 2.9           | <b>Cofactor metabolic processes</b>     |               |
| <b>Glycogen/glucan metabolism</b>                       |               | <i>Biotin metabolism</i>                |               |
| <i>GAC1</i>                                             | 2.6           | <i>BIO2</i>                             | 7.6           |
| <i>GDB1</i>                                             | 2.3           | <i>BIO4</i>                             | 2.5           |
| <i>GIP2</i>                                             | 2.8           | <i>Heme metabolism</i>                  |               |
| <i>GLC3</i>                                             | 2.2           | <i>HEM3</i>                             | 2.1           |
| <i>GPH1</i>                                             | 2.2           | <i>HEM13</i>                            | 2.3           |
| <i>GSC2</i>                                             | 2.6           | <i>HEM15</i>                            | 2.1           |
| <i>GSY2</i>                                             | 2.1           | <i>Iron-sulfur cluster biosynthesis</i> |               |
| <i>PGM2</i>                                             | 2.7           | <i>ISAI</i>                             | 2.5           |
| <b>Transmembrane transport</b>                          |               | <i>NFU1</i>                             | 2.0           |
| <i>AGP2</i>                                             | 2.0           | <i>YFH1</i>                             | 2.2           |
| <i>ALP1</i>                                             | 4.5           | <b>Nitrogen compound metabolism</b>     |               |
| <i>CCC2</i>                                             | 8.3           | <i>AAH1</i>                             | 2.6           |
| <i>COT1</i>                                             | 2.5           | <i>ARO9</i>                             | 5.4           |
| <i>NCA3</i>                                             | 2.3           | <i>ARO10</i>                            | 13.4          |
| <i>NFT1</i>                                             | 6.9           | <i>DAL3</i>                             | 2.0           |
| <i>PDR3</i>                                             | 5.5           | <i>DAL80</i>                            | 2.4           |
| <i>PDR5</i>                                             | 3.9           | <i>DUR3</i>                             | 3.6           |
| <i>PDR15</i>                                            | 14.0          | <i>GLT1</i>                             | 5.0           |
| <i>PDR16</i>                                            | 2.3           | <i>ILV3</i>                             | 2.6           |
| <i>RSB1</i>                                             | 13.1          | <i>LEU1</i>                             | 3.6           |
| <i>SNQ2</i>                                             | 3.9           | <i>LEU9</i>                             | 2.4           |
| <i>VBA3</i>                                             | 6.4           | <i>LYS4</i>                             | 2.9           |
| <i>VMR1</i>                                             | 15.4          | <i>MEP2</i>                             | 3.7           |
| <i>YCT1</i>                                             | 2.0           | <i>MYS1</i>                             | 2.8           |
| <i>YOR1</i>                                             | 2.6           | <i>RKII</i>                             | 2.3           |
|                                                         |               | <i>SER3</i>                             | 3.1           |
|                                                         |               | <i>URA7</i>                             | 2.0           |

Statistically relevant GO terms (biological processes) and the fold increase or decrease in respect to the WT are indicated. Omitted genes can be found in the Supplementary Data (microarray analysis).

\* Target genes for CTH1/CTH2-dependent degradation

## Supplementary References

66. Thomas, B.J. and Rothstein, R. (1989) Elevated recombination rates in transcriptionally active DNA. *Cell*, **56**, 619-630.
67. Brachmann, C.B., Davies, A., Cost, G.J., Caputo, E., Li, J., Hieter, P. and Boeke, J.D. (1998) Designer deletion strains derived from *Saccharomyces cerevisiae* S288C: a useful set of strains and plasmids for PCR-mediated gene disruption and other applications. *Yeast (Chichester, England)*, **14**, 115-132.
68. Gonzalez-Barrera, S., Cortes-Ledesma, F., Wellinger, R.E. and Aguilera, A. (2003) Equal sister chromatid exchange is a major mechanism of double-strand break repair in yeast. *Mol. Cell*, **11**, 1661-1671.
69. Holmes, A.M. and Haber, J.E. (1999) Double-strand break repair in yeast requires both leading and lagging strand DNA polymerases. *Cell*, **96**, 415-424.
70. Majka, J. and Burgers, P.M. (2005) Function of Rad17/Mec3/Ddc1 and its partial complexes in the DNA damage checkpoint. *DNA Repair (Amst)*, **4**, 1189-1194.
